# Supplementary material for: Structures of H5N1 influenza polymerase with ANP32B reveal mechanisms of genome replication and host adaptation
Source: Springer Nature journal article supplement (doi:10.1038/s41467-024-48470-3), 2024-05-15
Supplement: MOESM1 [file 41467_2024_48470_MOESM1_ESM.pdf]

# **Structures of H5N1 influenza polymerase with ANP32B reveal mechanisms of genome replication and host adaptation**

Ecco Staller<sup>1</sup>, Loïc Carrique<sup>2</sup>, Olivia C. Swann<sup>3</sup>, Haitian Fan<sup>1,4</sup>, Jeremy R. Keown<sup>2,5</sup>, Carol M. Sheppard<sup>3</sup>, Wendy S. Barclay<sup>3</sup>, Jonathan M. Grimes<sup>2</sup> & Ervin Fodor<sup>1</sup>

<sup>1</sup>Sir William Dunn School of Pathology, University of Oxford, Oxford, UK

<sup>2</sup>Division of Structural Biology, University of Oxford, Oxford, UK

<sup>3</sup>Section of Molecular Virology, Imperial College London, London, UK

<sup>4</sup>Current address: School of Basic Medical Sciences, Zhejiang University School of Medicine, Zhejiang University, Hangzhou, China

<sup>5</sup>Current address: School of Life Sciences, University of Warwick, Coventry, UK

**SUPPLEMENTARY FIGURES 1-6**

**SUPPLEMENTARY TABLES 1 & 2**

**SUPPLEMENTARY REFERENCES**

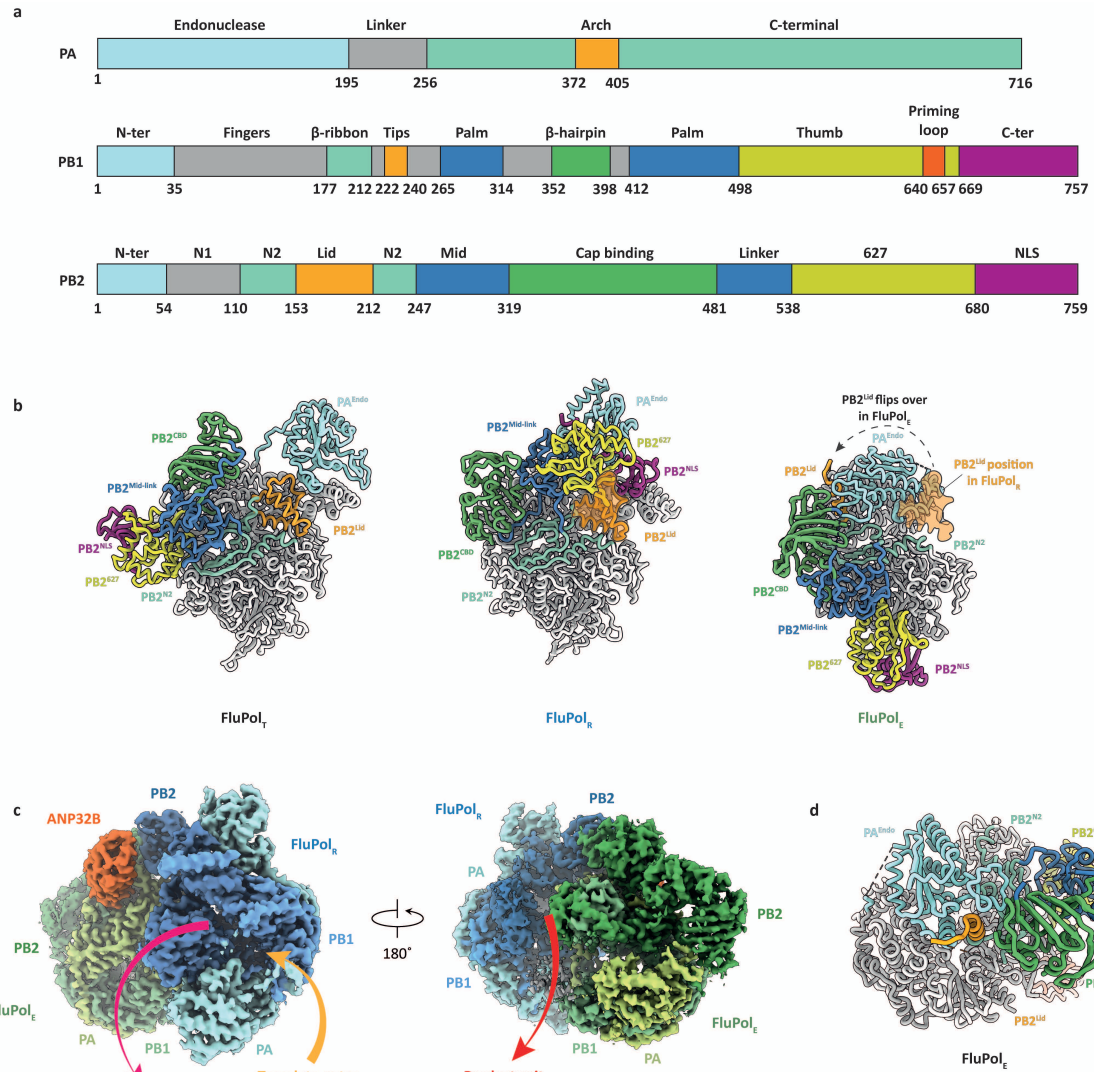

**Supplementary Figure 1. Subunits and domain organisation of FluPolA.** **a**, Domain organisation of FluPolA subunits PA, PB1 and PB2. **b**, Structural organization of the flexible PB2 C-terminal domains in the transcriptase (FluPol<sub>T</sub>, PDB 6RR7), replicase (FluPol<sub>R</sub>, PDB 8R1J) and encapsidating (FluPol<sub>E</sub>, PDB 8R1J) conformations. **c**, Cryo-EM map of IAV replication platform highlighting the position of the template entry and exit channels as well as the product exit channel in FluPol<sub>R</sub>. **d**, Interface between PA<sup>Endo</sup>, PB2<sup>Lid</sup> and PB2<sup>CBD</sup> in FluPol<sub>E</sub>.



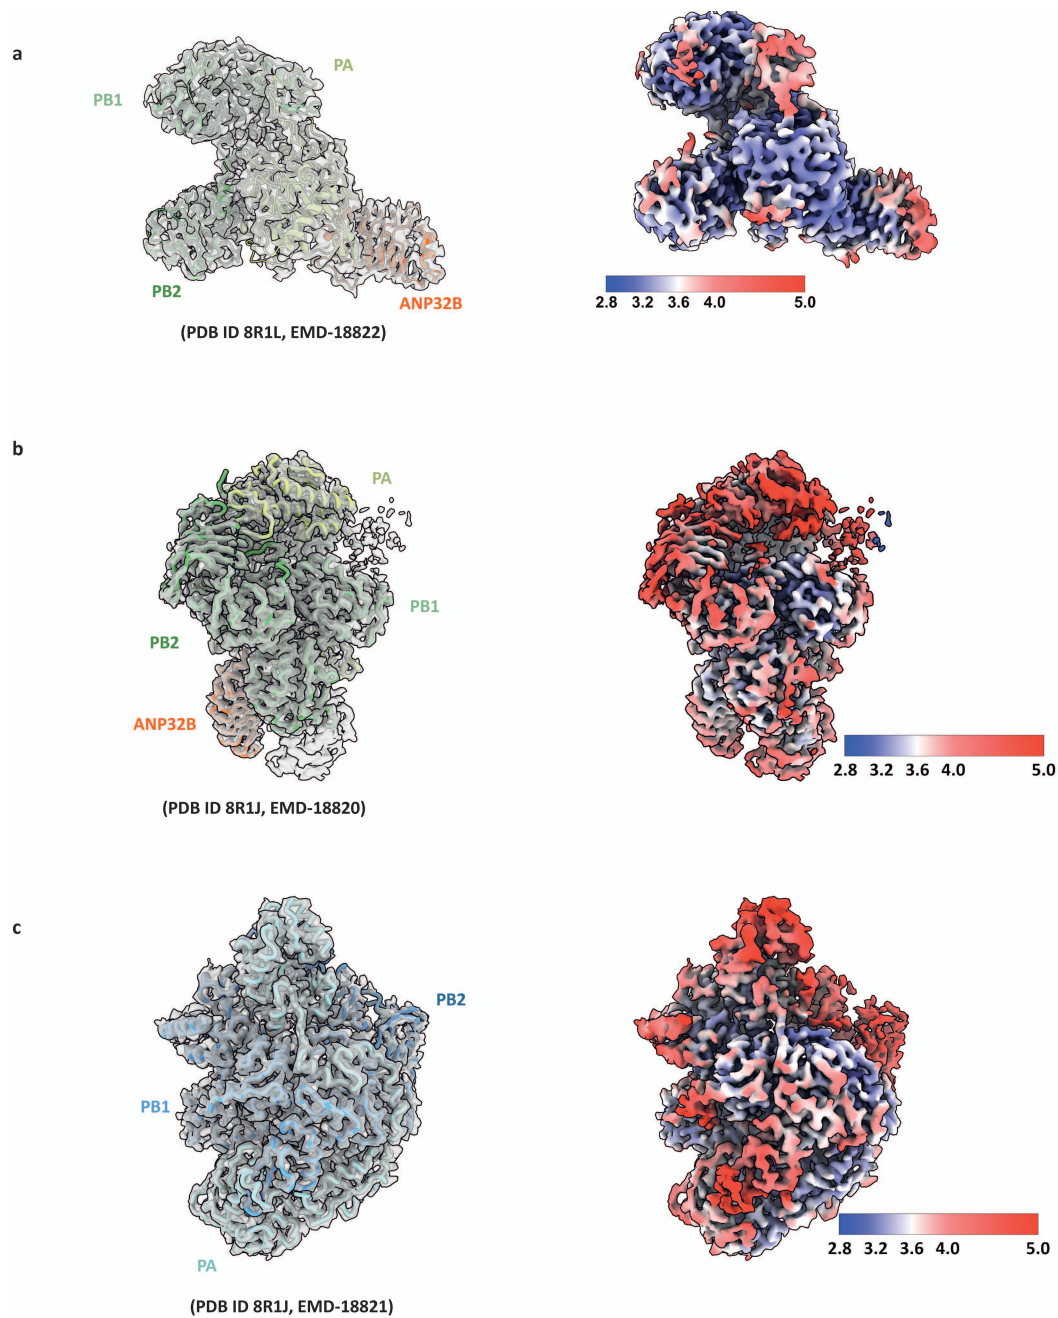

**Supplementary Figure 3. Model to map fits and local resolution estimates.** a-c, Model to map fits and local resolution estimates for the 3D reconstructions obtained during this study for monomeric FluPolA-ANP32B (**a**) and dimeric FluPolA-ANP32B (FluPol<sub>E</sub> + FluPol<sub>R</sub>-PB2<sup>627</sup> focused map (**b**) and FluPol<sub>R</sub> focused map (**c**)). Local resolutions were computed using CryoSPARC local resolution estimation tool.

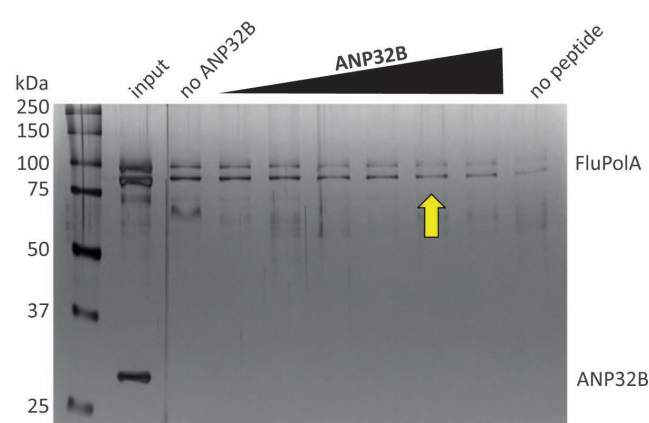

**Supplementary Figure 4. Pulldown experiment showing FluPolA (PB1 577E and PA 556R) binding to serine 5 phosphorylated RNAP II CTD peptide in the presence of increasing amounts of ANP32B (range 0.1-fold to 10-fold molar excess relative to FluPolA). The arrow indicates 3-fold molar excess which was selected for subsequent experiments. ANP32B in the input lane depicts 3-fold molar excess. Data represent a single experiment (n=1).**

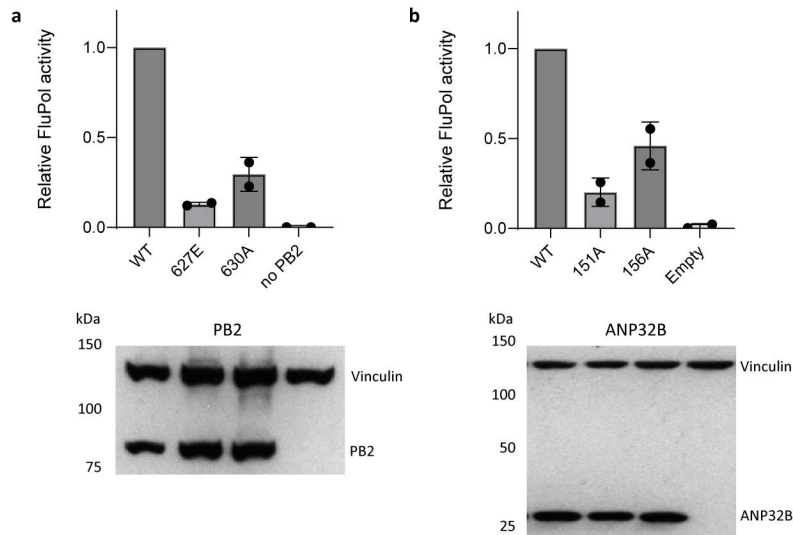

**Supplementary Figure 5. Mutations in PB2 and ANP32B affecting the FluPol<sub>E</sub>-ANP32B interface lead to reduced FluPol activity.** **a, b**, vRNP reconstitution assays were performed in 24-well plates of 293T (**a**) or eHAP TKO (**b**) cells transfected with 0.05  $\mu$ g pCAGGS plasmids expressing Tky05 PB1 577E, PA 556R, PB2 (as indicated) and NP, with pPollI-firefly luciferase reporter and pcDNA-ANP32B mutants as indicated. Empty pcDNA was co-transfected in negative control wells ('no PB2' and 'Empty') to ensure equal amounts of plasmid DNA in each well. Western blots show expression of PB2 (**a**) and ANP32B (**b**) mutants and Vinculin loading control. Note that the eHAP TKO cells do not express endogenous ANP32B. Data represent two biological repeats (n=2 biologically independent experiments), each in technical triplicate, presented as mean values  $\pm$  SD. Statistical significance (confidence interval = 95%) was determined by ordinary one-way ANOVA with Dunnett's multiple comparisons test. Values are compared to the wildtype condition which has been set to 1. P values in (**a**) are: 627E, P=0.0001; 630A, P=0.0003; and no PB2, P<0.0001. P values in (**b**) are: 151A, P=0.0012; 156A, P=0.0052; and Empty, P=0.0005. Source data are provided as a Source Data file.



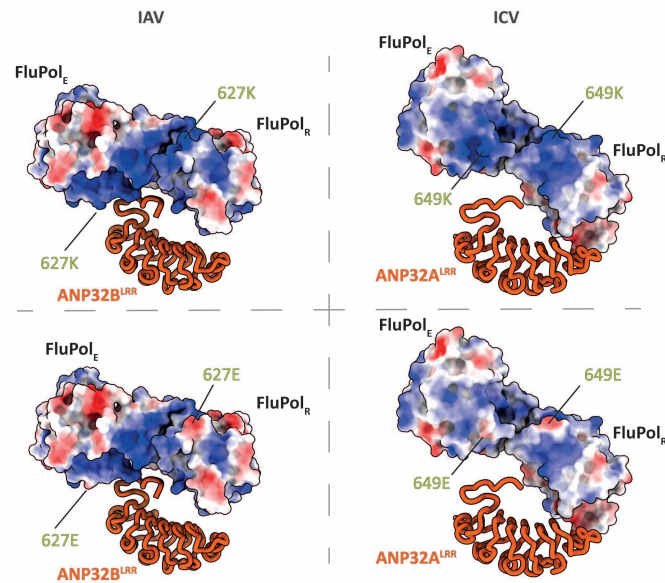

**Supplementary Figure 6. Positioning of PB2 residue 627 in FluPol<sub>E</sub> and FluPol<sub>R</sub> in the context of the IAV replication platform and of the equivalent residue 649 in the ICV replication platform.**

|                                            | FluPolA monomer - ANP32B<br>EMD-18822<br>8R1L | FluPolA dimer - ANP32B<br>EMD-18818<br>8R1J |
|--------------------------------------------|-----------------------------------------------|---------------------------------------------|
| <b>Data collection</b>                     |                                               |                                             |
| Microscope                                 | Titan Krios G3i (OPIC)                        | Titan Krios G3i (OPIC)                      |
| Voltage (kV)                               | 300                                           | 300                                         |
| Detector                                   | Falcon 4i - SelectrisX                        | Falcon 4i - SelectrisX                      |
| Recording mode                             | eer                                           | eer                                         |
| Magnification                              | 130,000                                       | 130,000                                     |
| Movie/micrograph pixel size (Å)            | 0.932                                         | 0.932                                       |
| Dose rate (e-/px/sec)                      | 9.37                                          | 9.42                                        |
| Number of frames per movie                 | 60                                            | 60                                          |
| Movie exposure time (s)                    | 4.95                                          | 4.9                                         |
| Total dose (e-/Å <sup>2</sup> )            | 50                                            | 50                                          |
| Defocus range (um)                         | 1.4 to 2.6                                    | 1.4 to 2.6                                  |
| <b>EM data processing</b>                  |                                               |                                             |
| Number of movies/micrographs               | 20,334                                        | 11,290                                      |
| Box size (px)                              | 300                                           | 400                                         |
| Particle number (total)                    | 2,100,000                                     | 1,700,000                                   |
| Particle number (used in final map)        | 67,000                                        | 105,000                                     |
| Symmetry                                   | C1                                            | C1                                          |
| Map resolution (Å, FSC 0.143)              | 3.12                                          | 3.24                                        |
| Local resolution range (Å, FSC 0.5)        | 2.78 - 30                                     | 2.94 - 30                                   |
| Map sharpening B-factor (Å <sup>2</sup> )  | 111                                           | 85.6                                        |
| <b>Model Building and Validation</b>       |                                               |                                             |
| Initial model used                         | 6RR7, AlphaFold model                         | 6RR7, AlphaFold model                       |
| Model composition                          |                                               |                                             |
| Non-hydrogen protein atoms                 | 22132                                         | 67795                                       |
| Protein residues                           | 1383                                          | 4238                                        |
| Nucleotides                                | /                                             | /                                           |
| B factors (Å <sup>2</sup> ) - min/max/mean |                                               |                                             |
| Protein                                    | 32.03/123.12/64.49                            | 23.35/156.28/76.74                          |
| Nucleotide                                 | /                                             | /                                           |
| Ligand                                     | /                                             | /                                           |
| RMSD from ideal                            |                                               |                                             |
| Bond length (Å)                            | 0.003                                         | 0.003                                       |
| Bond angles (°)                            | 0.505                                         | 0.523                                       |
| Validation                                 |                                               |                                             |
| Molprobity score                           | 1.75                                          | 1.89                                        |
| Clashscore                                 | 7.5                                           | 7.86                                        |
| Rotamers outliers (%)                      | 0                                             | 0                                           |
| FSC (0.5) model-vs-map                     | 3.4                                           | 3.4                                         |
| CC model-vs-map (masked)                   | 0.77                                          | 0.79                                        |
| Ramachandran plot                          |                                               |                                             |
| Favored (%)                                | 95.08                                         | 92.77                                       |
| Allowed (%)                                | 4.92                                          | 7.06                                        |
| Outliers (%)                               | 0                                             | 0.17                                        |

**Supplementary Table 1. Cryo-EM data collection, refinement and validation statistics.**



| FluPolA subunit | Adaptive mutation | Location              | FluPol <sub>R</sub> -FluPol <sub>E</sub> interface | FluPol <sub>E</sub> -ANP32 interface | IAV subtype | Reference                                                     |
|-----------------|-------------------|-----------------------|----------------------------------------------------|--------------------------------------|-------------|---------------------------------------------------------------|
| PB2             | T521I             | FluPol <sub>R</sub>   |                                                    |                                      | H7N9        | Soh <i>et al</i> eLife 2019 <sup>1</sup>                      |
|                 | K526R             | FluPol <sub>R</sub>   |                                                    |                                      | H5N1        | Song <i>et al</i> Nat Comms 2014 <sup>2</sup>                 |
|                 | A588I             | FluPol <sub>R</sub>   |                                                    |                                      | H1N1        | Lee <i>et al</i> Sci Rep 2020 <sup>3</sup>                    |
|                 | Q591R             | FluPol <sub>E</sub>   |                                                    |                                      | pH1N1       | Yamada <i>et al</i> Plos Path 2010 <sup>4</sup>               |
|                 | <b>E627K</b>      | FluPol <sub>E/R</sub> |                                                    |                                      | H2N2        | Subbarao <i>et al</i> J Virol 1993 <sup>5</sup>               |
|                 | M631L             | FluPol <sub>E</sub>   |                                                    |                                      | H9N2        | Idoko-Akoh <i>et al</i> Nat Comms 2023 <sup>6</sup>           |
|                 | D701N             | FluPol <sub>E/R</sub> |                                                    |                                      | H5N1        | Gao <i>et al</i> Plos Path 2009 <sup>7</sup>                  |
|                 | K702R             | FluPol <sub>E</sub>   |                                                    |                                      | H5N1        | Peacock <i>et al</i> J Virol 2023 <sup>8</sup>                |
|                 | S714R             | FluPol <sub>E</sub>   |                                                    |                                      | H5N1        | Czudai-Matwich <i>et al</i> J Virol 2014 <sup>9</sup>         |
| PA              | E327K             | FluPol <sub>E</sub>   |                                                    |                                      | H5N1        | Arai <i>et al</i> Plos Path 2016 <sup>10</sup>                |
|                 | L336M             | FluPol <sub>E</sub>   |                                                    |                                      | H5N1        | Welkers <i>et al</i> Emerg Microbes Infect 2019 <sup>11</sup> |
|                 | A343T             | FluPol <sub>E</sub>   |                                                    |                                      | H5N1        | Arai <i>et al</i> Sci Rep 2018 <sup>12</sup>                  |
|                 | E349K             | FluPol <sub>E</sub>   |                                                    |                                      | H1N1        | Chen <i>et al</i> Plos Path 2019 <sup>13</sup>                |
|                 | <b>N383D</b>      | FluPol <sub>E</sub>   |                                                    |                                      | H5N1        | Song <i>et al</i> Sci Rep 2015 <sup>14</sup>                  |
|                 | K385A             | FluPol <sub>E</sub>   |                                                    |                                      | H1N1        | Liang <i>et al</i> Plos One 2012 <sup>15</sup>                |
|                 | D386N             | FluPol <sub>E</sub>   |                                                    |                                      | H5N8        | Ali <i>et al</i> Viruses 2021 <sup>16</sup>                   |
|                 | S388R             | FluPol <sub>E</sub>   |                                                    |                                      | H5N1        | Arai <i>et al</i> J Virol 2020 <sup>17</sup>                  |
|                 | N409S             | FluPol <sub>E</sub>   |                                                    |                                      | H7N9        | Yamayoshi <i>et al</i> J Virol 2014 <sup>18</sup>             |
|                 | A448E             | FluPol <sub>R</sub>   |                                                    |                                      | H5N1        | Arai <i>et al</i> J Virol 2020 <sup>17</sup>                  |
|                 | Q556R             | FluPol <sub>E</sub>   |                                                    |                                      | H5N1        | Sheppard <i>et al</i> Nat Comms 2023 <sup>19</sup>            |
|                 | E613V             | FluPol <sub>R</sub>   |                                                    |                                      | H5N1        | Arai <i>et al</i> Sci Rep 2018 <sup>12</sup>                  |
|                 | K615N             | FluPol <sub>R</sub>   |                                                    |                                      | H7N7        | Gabriel <i>et al</i> PNAS 2005 <sup>20</sup>                  |

**Supplementary Table 2. Overview of mammalian adaptations in avian FluPolA.** Adaptations are organised by IAV subunit (PB2 or PA) and whether they are potentially enhancing ANP32 binding or stabilising the replication dimer interface. Adaptations in bold are present in wildtype Tky05 FluPol.

## References

1. Soh YS, Moncla LH, Eguia R, Bedford T, Bloom JD. Comprehensive mapping of adaptation of the avian influenza polymerase protein PB2 to humans. *Elife* **8**, (2019).
2. Song W, *et al.* The K526R substitution in viral protein PB2 enhances the effects of E627K on influenza virus replication. *Nature communications* **5**, 5509 (2014).
3. Lee C-Y, An S-H, Choi J-G, Lee Y-J, Kim J-H, Kwon H-J. Rank orders of mammalian pathogenicity-related PB2 mutations of avian influenza A viruses. *Scientific Reports* **10**, 5359 (2020).
4. Yamada S, *et al.* Biological and structural characterization of a host-adapting amino acid in influenza virus. *PLoS pathogens* **6**, e1001034 (2010).
5. Subbarao EK, London W, Murphy BR. A single amino acid in the PB2 gene of influenza A virus is a determinant of host range. *Journal of virology* **67**, 1761-1764 (1993).
6. Idoko-Akoh A, *et al.* Creating resistance to avian influenza infection through genome editing of the ANP32 gene family. *Nature communications* **14**, 6136 (2023).
7. Gao Y, *et al.* Identification of amino acids in HA and PB2 critical for the transmission of H5N1 avian influenza viruses in a mammalian host. *PLoS pathogens* **5**, e1000709 (2009).
8. Peacock TP, *et al.* Mammalian ANP32A and ANP32B Proteins Drive Differential Polymerase Adaptations in Avian Influenza Virus. *Journal of virology* **97**, e0021323 (2023).
9. Czudai-Matwich V, Otte A, Matrosovich M, Gabriel G, Klenk H-D. PB2 Mutations D701N and S714R Promote Adaptation of an Influenza H5N1 Virus to a Mammalian Host. *Journal of virology* **88**, 8735-8742 (2014).
10. Arai Y, *et al.* Novel Polymerase Gene Mutations for Human Adaptation in Clinical Isolates of Avian H5N1 Influenza Viruses. *PLoS pathogens* **12**, e1005583 (2016).
11. Welkers MRA, *et al.* Genetic diversity and host adaptation of avian H5N1 influenza viruses during human infection. *Emerg Microbes Infect* **8**, 262-271 (2019).
12. Arai Y, *et al.* Multiple polymerase gene mutations for human adaptation occurring in Asian H5N1 influenza virus clinical isolates. *Scientific Reports* **8**, 13066 (2018).
13. Chen KY, Santos Afonso ED, Enouf V, Isel C, Naffakh N. Influenza virus polymerase subunits co-evolve to ensure proper levels of dimerization of the heterotrimer. *PLoS pathogens* **15**, e1008034 (2019).

14. Song J, Xu J, Shi J, Li Y, Chen H. Synergistic Effect of S224P and N383D Substitutions in the PA of H5N1 Avian Influenza Virus Contributes to Mammalian Adaptation. *Sci Rep* **5**, 10510 (2015).
15. Liang Y, Danzy S, Dao LD, Parslow TG, Liang Y. Mutational Analyses of the Influenza A Virus Polymerase Subunit PA Reveal Distinct Functions Related and Unrelated to RNA Polymerase Activity. *PloS one* **7**, e29485 (2012).
16. Ali M, *et al.* Genetic Characterization of Highly Pathogenic Avian Influenza A(H5N8) Virus in Pakistani Live Bird Markets Reveals Rapid Diversification of Clade 2.3.4.4b Viruses. *Viruses* **13**, (2021).
17. Arai Y, *et al.* PA Mutations Inherited during Viral Evolution Act Cooperatively To Increase Replication of Contemporary H5N1 Influenza Virus with an Expanded Host Range. *Journal of virology* **95**, (2020).
18. Yamayoshi S, *et al.* Virulence-affecting amino acid changes in the PA protein of H7N9 influenza A viruses. *Journal of virology* **88**, 3127-3134 (2014).
19. Sheppard CM, *et al.* An Influenza A virus can evolve to use human ANP32E through altering polymerase dimerization. *Nature communications* **14**, 6135 (2023).
20. Gabriel G, Dauber B, Wolff T, Planz O, Klenk HD, Stech J. The viral polymerase mediates adaptation of an avian influenza virus to a mammalian host. *Proceedings of the National Academy of Sciences of the United States of America* **102**, 18590-18595 (2005).
